# Supplementary material for: User-friendly image-activated microfluidic cell sorting technique using an optimized, fast deep learning algorithm
Source: Royal Society of Chemistry journal article supplement (doi:10.1039/d0lc00747a), 2021-01-01
Supplement: d0lc00747a1.zip [file d0lc00747a1.zip]

## Sheet: 15um_10um_beads
Post-Sorting																Pre-Sorting
	15um (Blue)	10um (Green)				15um (Blue)	10um (Green)				15um (Blue)	10um (Green)					15um (Blue)	10um (Green)
A1_C1	32	4	88.8889	11.1111	A2_C1	95	1	98.9583	1.04167	A3_C1	20	0	100	0		A_1	23	576	3.83973	96.1603
A1_C2	59	2	96.7213	3.27869	A2_C2	105	3	97.2222	2.77778	A3_C2	39	0	100	0		A_2	27	824	3.17274	96.8273
A1_C3	72	0	100	0	A2_C3	65	1	98.4848	1.51515	A3_C3	29	0	100	0		A_3	36	542	6.22837	93.7716
A1_C4	54	1	98.1818	1.81818	A2_C4	58	1	98.3051	1.69492	A3_C4	10	2	83.3333	16.6667		A_4	14	287	4.65116	95.3488
A1_C5	68	3	95.7746	4.22535	A2_C5	76	1	98.7013	1.2987	A3_C5	54	2	96.4286	3.57143		A_5	84	826	9.23077	90.7692
A1_C6	56	0	100	0	A2_C6	105	1	99.0566	0.943396	A3_C6	65	0	100	0		A_6	52	574	8.30671	91.6933
A1_C7	55	2	96.4912	3.50877	A2_C7	102	2	98.0769	1.92308	A3_C7	48	4	92.3077	7.69231		A_7	61	967	5.93385	94.0661
A1_C8	52	1	98.1132	1.88679	A2_C8	64	1	98.4615	1.53846	A3_C8	23	0	100	0		A_8	58	733	7.33249	92.6675
A1_C9	52	0	100	0	A2_C9	103	5	95.3704	4.62963	A3_C9	58	1	98.3051	1.69492		A_9	96	747	11.3879	88.6121
A1_C10	63	0	100	0	A2_C10	123	4	96.8504	3.14961	A3_C10	43	0	100	0		A_10	74	867	7.86397	92.136
A1_C11	49	0	100	0	A2_C11	76	1	98.7013	1.2987	A3_C11	46	0	100	0		A_11	53	762	6.50307	93.4969
A1_C12	50	5	90.9091	9.09091	A2_C12	57	1	98.2759	1.72414	A3_C12	20	0	100	0		A_12	17	298	5.39683	94.6032
A1_C13	61	0	100	0	A2_C13	54	0	100	0	A3_C13	31	0	100	0		A_13	18	412	4.18605	95.814
A1_C14	60	1	98.3607	1.63934	A2_C14	74	4	94.8718	5.12821	A3_C14	28	1	96.5517	3.44828		A_14	83	791	9.49657	90.5034
A1_C15	48	0	100	0	A2_C15	82	1	98.7952	1.20482	A3_C15	41	0	100	0		A_15	51	691	6.87332	93.1267
Average:			97.3886	2.61137	Average:			97.9526	2.04739	Average:			97.6376	2.3624		Average:			6.69357	93.3064
Sum:	831	19	850		Sum:	1239	27	1266		Sum:	555	10	565			Sum:	747	9897	10644
	97.7647	2.23529				97.8673	2.1327				98.2301	1.76991					7.01804	92.982
Waste																Result
	15um (Blue)	10um (Green)				15um (Blue)	10um (Green)				15um (Blue)	10um (Green)					Purity (%)	Yield (%)	Enrichment factor
A1_W1	13	426	2.96128	97.0387	A2_W1	8	249	3.11284	96.8872	A3_W1	13	259	4.77941	95.2206		A1	97.7647	72.7957	13.9305
A1_W2	12	544	2.15827	97.8417	A2_W2	13	446	2.83224	97.1678	A3_W2	14	227	5.80913	94.1909		A2	97.8673	69.7794	13.9451
A1_W3	7	446	1.54525	98.4547	A2_W3	3	379	0.78534	99.2147	A3_W3	6	167	3.46821	96.5318		A3	98.2301	55.539	13.9968
A1_W4	17	392	4.15648	95.8435	A2_W4	1	229	0.434783	99.5652	A3_W4	6	196	2.9703	97.0297
A1_W5	8	703	1.12518	98.8748	A2_W5	11	840	1.2926	98.7074	A3_W5	19	493	3.71094	96.2891		Average:	97.954	66.038	13.9575
A1_W6	10	1075	0.921659	99.0783	A2_W6	42	1543	2.64984	97.3502	A3_W6	43	1338	3.11369	96.8863
A1_W7	18	668	2.62391	97.3761	A2_W7	16	506	3.06513	96.9349	A3_W7	18	581	3.00501	96.995
A1_W8	14	410	3.30189	96.6981	A2_W8	5	237	2.06612	97.9339	A3_W8	8	381	2.05656	97.9434
A1_W9	14	784	1.75439	98.2456	A2_W9	5	860	0.578035	99.422	A3_W9	40	1414	2.75103	97.249
A1_W10	20	849	2.3015	97.6985	A2_W10	54	2159	2.44013	97.5599	A3_W10	52	1953	2.59352	97.4065
A1_W11	8	761	1.04031	98.9597	A2_W11	22	1131	1.90807	98.0919	A3_W11	21	668	3.0479	96.9521
A1_W12	7	533	1.2963	98.7037	A2_W12	12	373	3.11688	96.8831	A3_W12	14	248	5.34351	94.6565
A1_W13	13	666	1.91458	98.0854	A2_W13	13	702	1.81818	98.1818	A3_W13	18	389	4.4226	95.5774
A1_W14	13	789	1.62095	98.3791	A2_W14	26	979	2.58706	97.4129	A3_W14	35	976	3.46192	96.5381
A1_W15	14	613	2.23285	97.7671	A2_W15	9	443	1.99115	98.0088	A3_W15	24	987	2.37389	97.6261
Average:			2.06365	97.9363	Average:			2.04523	97.9548	Average:			3.52717	96.4728
Sum:	188	9659	9847		Sum:	240	11076	11316		Sum:	331	10277	10608
	1.90921	98.0908				2.12089	97.8791				3.12029	96.8797

## Sheet: HL60_Jurkat_cells
Post-Sorting																Pre-Sorting
	HL60 (Green)	Jurkat (Blue)				HL60 (Green)	Jurkat (Blue)				HL60 (Green)	Jurkat (Blue)					HL60 (Green)	Jurkat (Blue)
B1_C1	19	1	95	5	B2_C1	24	1	96	4	B3_C1	8	2	80	20		B_1	34	248	12.0567	87.9433
B1_C2	20	0	100	0	B2_C2	23	0	100	0	B3_C2	10	1	90.9091	9.09091		B_2	36	254	12.4138	87.5862
B1_C3	13	1	92.8571	7.14286	B2_C3	14	1	93.3333	6.66667	B3_C3	12	0	100	0		B_3	40	178	18.3486	81.6514
B1_C4	12	2	85.7143	14.2857	B2_C4	13	2	86.6667	13.3333	B3_C4	16	0	100	0		B_4	45	268	14.377	85.623
B1_C5	28	1	96.5517	3.44828	B2_C5	42	2	95.4545	4.54545	B3_C5	26	2	92.8571	7.14286		B_5	49	279	14.939	85.061
B1_C6	69	2	97.1831	2.8169	B2_C6	43	3	93.4783	6.52174	B3_C6	22	1	95.6522	4.34783		B_6	38	262	12.6667	87.3333
B1_C7	22	1	95.6522	4.34783	B2_C7	22	1	95.6522	4.34783	B3_C7	14	0	100	0		B_7	32	234	12.0301	87.9699
B1_C8	24	1	96	4	B2_C8	16	0	100	0	B3_C8	16	0	100	0		B_8	27	231	10.4651	89.5349
B1_C9	73	5	93.5897	6.41026	B2_C9	58	1	98.3051	1.69492	B3_C9	23	2	92	8		B_9	54	284	15.9763	84.0237
B1_C10	49	1	98	2	B2_C10	98	6	94.2308	5.76923	B3_C10	37	1	97.3684	2.63158		B_10	152	375	28.8425	71.1575
B1_C11	16	1	94.1176	5.88235	B2_C11	35	3	92.1053	7.89474	B3_C11	19	0	100	0		B_11	36	250	12.5874	87.4126
B1_C12	4	1	80	20	B2_C12	21	1	95.4545	4.54545	B3_C12	16	2	88.8889	11.1111		B_12	29	252	10.3203	89.6797
B1_C13	31	1	96.875	3.125	B2_C13	43	4	91.4894	8.51064	B3_C13	19	2	90.4762	9.52381		B_13	38	239	13.7184	86.2816
B1_C14	44	2	95.6522	4.34783	B2_C14	46	1	97.8723	2.12766	B3_C14	12	1	92.3077	7.69231		B_14	37	241	13.3094	86.6906
B1_C15	22	0			B2_C15	32	1	96.9697	3.0303	B3_C15	8	1	88.8889	11.1111		B_15	39	234	14.2857	85.7143
Average:			94.0852	5.91479	Average:			95.003	4.99698	Average:			94.3185	5.68146		Average:			14.4225	85.5775
Sum:	446	20	466		Sum:	530	27	557		Sum:	258	15	273			Sum:	686	3829	4515
	95.7082	4.29185				95.1526	4.8474				94.5055	5.49451					15.1938	84.8062
Waste																Result
	HL60 (Green)	Jurkat (Blue)				HL60 (Green)	Jurkat (Blue)				HL60 (Green)	Jurkat (Blue)					Purity (%)	Yield (%)	Enrichment factor
B1_W1	3	100	2.91262	97.0874	B2_W1	13	202	6.04651	93.9535	B3_W1	6	59	9.23077	90.7692		B1	95.7082	75.8606	6.29916
B1_W2	2	139	1.41844	98.5816	B2_W2	7	208	3.25581	96.7442	B3_W2	1	33	2.94118	97.0588		B2	95.1526	68.7426	6.26259
B1_W3	3	72	4	96	B2_W3	9	144	5.88235	94.1176	B3_W3	1	7	12.5	87.5		B3	94.5055	70.0077	6.22
B1_W4	4	83	4.5977	95.4023	B2_W4	7	136	4.8951	95.1049	B3_W4	1	29	3.33333	96.6667
B1_W5	8	216	3.57143	96.4286	B2_W5	13	293	4.24837	95.7516	B3_W5	3	54	5.26316	94.7368		Average:	95.1221	71.537	6.26059
B1_W6	7	209	3.24074	96.7593	B2_W6	11	317	3.35366	96.6463	B3_W6	2	65	2.98507	97.0149
B1_W7	5	121	3.96825	96.0317	B2_W7	10	230	4.16667	95.8333	B3_W7	1	49	2	98
B1_W8	5	78	6.0241	93.9759	B2_W8	16	196	7.54717	92.4528	B3_W8	3	54	5.26316	94.7368
B1_W9	7	215	3.15315	96.8468	B2_W9	17	329	4.91329	95.0867	B3_W9	1	64	1.53846	98.4615
B1_W10	6	204	2.85714	97.1429	B2_W10	16	368	4.16667	95.8333	B3_W10	5	55	8.33333	91.6667
B1_W11	6	164	3.52941	96.4706	B2_W11	12	189	5.97015	94.0299	B3_W11	2	54	3.57143	96.4286
B1_W12	7	89	7.29167	92.7083	B2_W12	5	97	4.90196	95.098	B3_W12	0	40	0	100
B1_W13	8	194	3.9604	96.0396	B2_W13	9	169	5.05618	94.9438	B3_W13	3	75	3.84615	96.1538
B1_W14	6	188	3.09278	96.9072	B2_W14	6	200	2.91262	97.0874	B3_W14	2	60	3.22581	96.7742
B1_W15	6	108	5.26316	94.7368	B2_W15	9	131	6.42857	93.5714	B3_W15	5	56	8.19672	91.8033
Average:			3.82985	96.1702	Average:			4.80832	95.1917	Average:			4.81524	95.1848
Sum:	83	2180	2263		Sum:	160	3209	3369		Sum:	36	754	790
	3.6677	96.3323				4.74918	95.2508				4.55696	95.443

## Sheet: HL60_K562_cells
Post-Sorting																Pre-Sorting
	HL60 (Green)	K562 (Red)				HL60 (Green)	K562 (Red)				HL60 (Green)	K562 (Red)					HL60 (Green)	K562 (Red)
C1_C1	21	0	100	0	C2_C1	24	2	92.3077	7.69231	C3_C1	20	0	100	0		C_1	33	132	20	80
C1_C2	14	1	93.3333	6.66667	C2_C2	33	2	94.2857	5.71429	C3_C2	20	2	90.9091	9.09091		C_2	30	163	15.544	84.456
C1_C3	31	1	96.875	3.125	C2_C3	28	4	87.5	12.5	C3_C3	41	2	95.3488	4.65116		C_3	43	243	15.035	84.965
C1_C4	38	1	97.4359	2.5641	C2_C4	31	1	96.875	3.125	C3_C4	34	2	94.4444	5.55556		C_4	39	227	14.6617	85.3383
C1_C5	21	1	95.4545	4.54545	C2_C5	31	0	100	0	C3_C5	19	0	100	0		C_5	22	120	15.493	84.507
C1_C6	18	1	94.7368	5.26316	C2_C6	27	2	93.1034	6.89655	C3_C6	17	2	89.4737	10.5263		C_6	25	111	18.3824	81.6176
C1_C7	48	6	88.8889	11.1111	C2_C7	22	2	91.6667	8.33333	C3_C7	44	4	91.6667	8.33333		C_7	52	219	19.1882	80.8118
C1_C8	46	4	92	8	C2_C8	33	1	97.0588	2.94118	C3_C8	52	1	98.1132	1.88679		C_8	60	292	17.0455	82.9545
C1_C9	33	1	97.0588	2.94118	C2_C9	21	3	87.5	12.5	C3_C9	18	1	94.7368	5.26316		C_9	33	233	12.406	87.594
C1_C10	14	1	93.3333	6.66667	C2_C10	18	0	100	0	C3_C10	13	2	86.6667	13.3333		C_10	36	117	23.5294	76.4706
C1_C11	26	3	89.6552	10.3448	C2_C11	30	1	96.7742	3.22581	C3_C11	31	1	96.875	3.125		C_11	45	146	23.5602	76.4398
C1_C12	49	3	94.2308	5.76923	C2_C12	19	1	95	5	C3_C12	23	2	92	8		C_12	51	182	21.8884	78.1116
C1_C13	21	1	95.4545	4.54545	C2_C13	18	3	85.7143	14.2857	C3_C13	21	1	95.4545	4.54545		C_13	30	110	21.4286	78.5714
C1_C14	25	1	96.1538	3.84615	C2_C14	21	1	95.4545	4.54545	C3_C14	12	3	80	20		C_14	30	138	17.8571	82.1429
C1_C15	26	1	96.2963	3.7037	C2_C15	20	1	95.2381	4.7619	C3_C15	18	0	100	0		C_15	23	153	13.0682	86.9318
Average:			94.6151	5.27285	Average:			93.8029	6.19712	Average:			93.2635	6.7365		Average:			17.9392	82.0608
Sum:	431	26	457		Sum:	376	24	400		Sum:	383	23	406			Sum:	552	2586	3138
	94.3107	5.68928				94	6				94.335	5.66502					17.5908	82.4092
Waste																Result
	HL60 (Green)	K562 (Red)				HL60 (Green)	K562 (Red)				HL60 (Green)	K562 (Red)					Purity (%)	Yield (%)	Enrichment factor
C1_W1	4	91	4.21053	95.7895	C2_W1	3	99	2.94118	97.0588	C3_W1	5	73	6.41026	93.5897		C1	94.3107	72.3359	5.36136
C1_W2	8	99	7.47664	92.5234	C2_W2	3	98	2.9703	97.0297	C3_W2	6	92	6.12245	93.8776		C2	94	70.2709	5.3437
C1_W3	12	221	5.15021	94.8498	C2_W3	5	177	2.74725	97.2527	C3_W3	12	176	6.38298	93.617		C3	94.335	68.6484	5.36274
C1_W4	11	204	5.11628	94.8837	C2_W4	16	244	6.15385	93.8462	C3_W4	17	237	6.69291	93.3071
C1_W5	5	139	3.47222	96.5278	C2_W5	6	137	4.1958	95.8042	C3_W5	9	102	8.10811	91.8919		Average:	94.2152	70.4184	5.35593
C1_W6	8	172	4.44444	95.5556	C2_W6	12	139	7.94702	92.053	C3_W6	7	126	5.26316	94.7368
C1_W7	13	278	4.46735	95.5326	C2_W7	10	222	4.31034	95.6897	C3_W7	13	288	4.31894	95.6811
C1_W8	18	336	5.08475	94.9153	C2_W8	15	223	6.30252	93.6975	C3_W8	26	366	6.63265	93.3673
C1_W9	12	192	5.88235	94.1176	C2_W9	6	132	4.34783	95.6522	C3_W9	7	126	5.26316	94.7368
C1_W10	10	123	7.5188	92.4812	C2_W10	3	114	2.5641	97.4359	C3_W10	0	80	0	100
C1_W11	11	258	4.08922	95.9108	C2_W11	13	151	7.92683	92.0732	C3_W11	12	214	5.30973	94.6903
C1_W12	12	202	5.60748	94.3925	C2_W12	8	178	4.30108	95.6989	C3_W12	4	166	2.35294	97.6471
C1_W13	9	149	5.6962	94.3038	C2_W13	9	108	7.69231	92.3077	C3_W13	8	114	6.55738	93.4426
C1_W14	3	133	2.20588	97.7941	C2_W14	7	104	6.30631	93.6937	C3_W14	4	58	6.45161	93.5484
C1_W15	6	179	3.24324	96.7568	C2_W15	7	103	6.36364	93.6364	C3_W15	6	112	5.08475	94.9153
Average:			5.03017	94.9698	Average:			5.05048	94.9495	Average:			5.39673	94.6033
Sum:	142	2776	2918		Sum:	123	2229	2352		Sum:	136	2330	2466
	4.86635	95.1337				5.22959	94.7704				5.515	94.485
